# Supplementary material
Source: PubMed Central journal article supplement (PMC3491993)
Supplement: NIHMS382736-supplement-Supplementary_Data.pdf [file NIHMS382736-supplement-Supplementary_Data.pdf]

# Molecular imaging true color spectroscopic optical coherence tomography

Francisco E. Robles, Christy Wilson, Gerald Grant and Adam Wax\*

\*Corresponding author: a.wax@duke.edu

## Supplementary Information

### Supplementary Figures

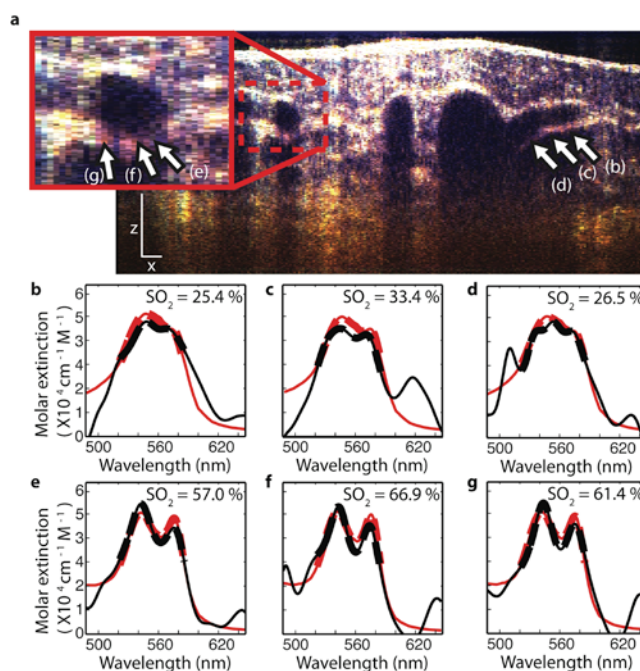

**Supplementary Figure 1 | Tomographic (x-z) METRICS OCT image with a close up of a vessel, and spectral profiles.** **a**, Cross-sectional image, located on point (b) as shown in the *en-face* (x-y) image in Fig 3. The white x and z scale bars are 100  $\mu\text{m}$ . **b-d**, Spectral profiles from points (b)-(d), sampled across the diameter of a deoxygenated vessel. **e-f**, Spectral profiles from points (e)-(f), sampled longitudinally along a vessel with higher oxygen saturation levels. In both vessels, relatively small variations of only a few percent in saturation are observed.
